# Supplementary material for: Effects of Souvenaid on plasma micronutrient levels and fatty acid profiles in mild and mild-to-moderate Alzheimer’s disease
Source: Springer Nature journal article supplement (doi:10.1186/s13195-015-0134-1), 2015-07-23
Supplement: MOESM1 [file 9785086]

## **List of Independent Ethics Committees or Institutional Review Boards**

### **Souvenir I**

#### The Netherlands:

- VU medical centre, Amsterdam
- Radboud University medical centre, Nijmegen
- Academic Hospital Maastricht, Maastricht
- Jeroen Bosch Hospital, 's-Hertogenbosch
- University Medical Centre Utrecht, Utrecht
- Medical Centre Alkmaar, Alkmaar
- University Medical Centre Groningen, Groningen
- Gelderse Vallei Hospital, Ede
- Tergooziekenhuizen, Blaricum
- Diaconessenhuis Leiden, Leiden
- Amphia Hospital, Breda

#### Belgium:

- University Hospital Gasthuisberg, Leuven
- AZN Middelheim, Antwerpen
- Virga Jess kliniek, Hasselt
- Universitair Ziekenhuis Gent, Gent
- Heilig Hart ziekenhuis, Roeselare
- Sint Andries ziekenhuis, Tielt

#### Germany:

- Ethikkommission der Fakultät für Medizin der Technischen Universität München, München
- Ethikkommission der Sächsische Landesärztekammer, Dresden
- Ethikkommission Medizinische Fakultät Carl Gustav Carus der Technische Universität Dresden, Dresden
- Ethikkommission der Medizinischen Fakultät Heidelberg, Heidelberg
- Ethik-Kommission der Ärztekammer Hamburg, Hamburg
- Ethik-Kommission der Georg-August Universität Göttingen, Göttingen
- Ethik-Kommission der Medizinischen Fakultät der Ruhr-Universität Bochum, Bochum
- Ethikkommission der Ärztekammer Nordrhein, Düsseldorf
- Ethik-Kommission der Ärztekammer Schleswig-Holstein, Bad Segeberg
- Ethik-Kommission bei der Landesärztekammer Hessen, Frankfurt am Main
- Ethik-Kommission der Bayerischen Landesärztekammer, München
- Ethik-Kommission der Georg-August Universität Göttingen, Göttingen
- Ethik-Kommission der Medizinischen Fakultät der Ruhr-Universität Bochum, Bochum
- Ethik-Kommission der Ärztekammer Nordrhein, Düsseldorf

#### United Kingdom:

- Southampton & South West Hampshire REC, Southampton
- Bath Local Research Ethics Committee
- Swindon Research Ethics Committee
- Bradford Research Ethics Committee
- Cumbria and Lancashire Ethics Committee

#### United States:

- Institutional Review Board Saint Louis University Care, St. Louis

## **Souvenir II**

### The Netherlands

#### *For central approval*

- Medisch Ethische Toetsingscommissie VUmc, Amsterdam

#### *For assessment of local feasibility*

- Medisch Ethische Commissie azM/UM, Maastricht
- Commissie Mensgebonden Onderzoek regio Arnhem-Nijmegen
- Medisch Ethische Toetsingscommissie Catharina Ziekenhuis, Eindhoven
- Medisch Ethische Toetsingscommissie Amphia, Breda
- Wetenschapsbureau Jeroen Bosch Ziekenhuis, Den Bosch
- LAWO Orbis Medisch Centrum (Lokale Adviesgroep Wetenschappelijk Onderzoek), Sittard
- Regionale Toetsingscommissie Patiëntgebonden Onderzoek, Leeuwarden
- Medisch Ethische Toetsingscommissie Tergooiziekenhuizen, Blaricum

### Belgium

#### *For central approval*

- Commissie Medische Ethiek ZNA/O.C.M.W., Antwerp

#### *For local positive opinion*

- Comité voor Medische Ethiek, Sint-Andriesziekenhuis Tielt
- Medische Ethische Commissie H. Hartziekenhuis, Roeselare
- Ethisch Comité vzw Emmaüs, AZ Sint-Maarten, Mechelen
- Ethisch Comité Sint-Trudoziekenhuis, Sint-Truiden

### Germany

#### *For central approval by each EC*

- Ethik-Kommission der Universität Ulm
- Ethik-Kommission der Ärztekammer Nordrhein
- Ethik-Kommission der sächsischen Landesärztekammer
- Ethik-Kommission der Ärztekammer Westfalen-Lippe und der Medizinischen Fakultät der Westfälischen Wilhelms-Universität Münster
- Ethikkommission der medizinischen Fakultät Heidelberg
- Ethik-Kommission der Bayerischen Landesärztekammer
- Ethik-Kommission der Medizinischen Fakultät der Universität zu Köln Forum

### Spain

#### *For central approval by each EC*

- Comité ético de investigación clínica. Hospital de la Santa Creu i Sant Pau, Barcelona
- Comité ético de investigación clínica. Hospital Clínico San Carlos, Madrid
- H.Clinic I Provincial EC Agencia de Ensayos Clínicos, Hospital Clinic de Barcelona.
- Hospital Virgen Arrixaca EC, Murcia

### Italy

#### *For central approval by each EC*

- Comitato Etico Fondazione Ospedale Maggiore, Milan
- Comitato Etico Aziende Sanitarie Umbria
- Comitato Etico dell'Università Cattolica del Sacro Cuore, Rome
- Comitato Etico dell'Ázienda Ospedaliera Universitaria s. Martino di Genova

### France

#### *For central approval*

- CPP sud-ouest, Toulouse

## **Open-label extension**

### The Netherlands

#### *For central approval*

- Independent Review Board Nijmegen (IRBN), Nijmegen

#### *For assessment of local feasibility*

- Medisch Ethische Toetsingscommissie VUmc, Amsterdam
- Medisch Ethische Commissie azM/UM, Maastricht
- Commissie Mensgebonden Onderzoek regio Arnhem-Nijmegen
- Medisch Ethische Toetsingscommissie Catharina Ziekenhuis, Eindhoven
- Medisch Ethische Toetsingscommissie Amphibia, Breda
- Wetenschapsbureau Jeroen Bosch Ziekenhuis, Den Bosch
- LAWO Orbis Medisch Centrum (Lokale Adviesgroep Wetenschappelijk Onderzoek), Sittard
- Regionale Toetsingscommissie Patiëntgebonden Onderzoek, Leeuwarden
- Medisch Ethische Toetsingscommissie Tergooiziekenhuizen, Blaricum

### Belgium

#### *For central approval*

- Commissie Medische Ethiek ZNA/O.C.M.W., Antwerp

#### *For local positive opinion*

- Comité voor Medische Ethiek, Sint-Andriesziekenhuis Tielt
- Medische Ethische Commissie H. Hartziekenhuis, Roeselare
- Ethisch Comité vzw Emmaüs, AZ Sint-Maarten, Mechelen
- Ethisch Comité Sint-Trudoziekenhuis, Sint-Truiden

### Germany

#### *For central approval by each EC*

- Ethik-Kommission der Universität Ulm
- Ethik-Kommission der Ärztekammer Nordrhein
- Ethik-Kommission der sächsischen Landesärztekammer
- Ethikkommission der medizinischen Fakultät Heidelberg
- Ethik-Kommission der Bayerischen Landesärztekammer

### Spain

#### *For central approval by each EC*

- Comité ético de investigación clínica. Hospital de la Santa Creu i Sant Pau, Barcelona
- Comité ético de investigación clínica. Hospital Clínico San Carlos, Madrid
- H.Clinic I Provincial EC Agencia de Ensayos Clínicos, Hospital Clinic de Barcelona.

### Italy

#### *For central approval by each EC*

- Comitato Etico Fondazione Ospedale Maggiore, Milan
- Comitato Etico Aziende Sanitarie Umbria
- Comitato Etico dell'Ázienda Ospedaliera Universitaria s. Martino di Genova

### France

#### *Central approval*

- CPP sud-ouest, Toulouse

## **S-Connect**

### United States

- Quorum Review IRB as the central Ethics Committee for sites 013, 040, 049, 022, 005, 034, 028, 047, 056, 025, 045, 051, 052, 041, 053, 004, 042, 024, 050, 021, 017, 039, 046, 029, 002, 057, 023, 032, 036, 037, 043, 048, 020, 027, 033 (see also chapter 2 for detailed site information).
- For site 011: Medical College of Wisconsin, IRB Human Research Review Committee
- For site 014: University of Kansas Medical Center, Human Subjects Committee
- For site 003: Indiana University, IRB
- For site 008: University of Pennsylvania, IRB
- For site 035: University of Kentucky, Medical IRB
- For site 044: Drexel University College of Medicine, IRB
- For site 038: Medical University of South Carolina, IRB
- For site 006: Saint Louis University, IRB (Biomedical)
- For site 011: Oregon Health and Science University, IRB
- For site 012: University of Florida, IRB
- For site 007: University of Texas Health Science Center, IRB
- For site 001: Rush University Medical Center, IRB
- For site 016: Wake Forest University Health Sciences, IRB

### **Study centres S-Connect**

#### *Principal investigators:*

|                                | <i>Site, USA</i>                                                                                            |
|--------------------------------|-------------------------------------------------------------------------------------------------------------|
| – 001 - Shah Raj C             | Rush University Medical Center, Chicago, IL                                                                 |
| – 002 - Mulroy Amy E.          | Clinical Trials of Texas Inc., San Antonio, TX                                                              |
| – 003 - Farlow Martin R        | Dept of Neurology, Indiana Alzheimer Disease Center<br>Indianapolis, IN                                     |
| – 004 - Hyman Lawrence R       | Howard Behavioral Health Inc. Columbia Medical Center,<br>Columbia, MD                                      |
| – 005 - Schwartz Matthew T     | Behavioral Medical Research of Brooklyn, Brooklyn, NY                                                       |
| – 006 - Morley John E          | Saint Louis University Medical Center, St. Louis, MO                                                        |
| – 007 - Royall Donald R.       | University of Texas Health Science Center, San Antonio, TX                                                  |
| – 008 - Huege Steven F         | Penn Memory Center University of Pennsylvania, Philadelphia,<br>PA                                          |
| – 010 - Antuono Piero G        | Medical College of Wisconsin, Milwaukee, WI                                                                 |
| – 011 - Quinn Joseph           | Oregon Health and Science University Aging and Alzheimer<br>Disease Center, Portland, OR                    |
| – 012 - Raj Ashok              | Byrd Alzheimer's Institute Tampa, FL                                                                        |
| – 013 - Baker Matthew J.       | Collier Neurologic Specialists, Naples, FL                                                                  |
| – 014 - Burns Jeffrey M.       | University of Kansas Medical Center - Department of<br>Neurology, Kansas City, KS                           |
| – 016 - Sink Kaycee            | Kylynch Center for Memory & Cognition Research Wake<br>Forest University Health Sciences, Winston-Salem, NC |
| – 017 - Kudrow David           | David Kudrow MD, Santa Monica, CA                                                                           |
| – 020 - Shua-Haim Joshua R     | Alzheimer's Research Corporation, Manchester, NY                                                            |
| – 021 - Knesevich Mary Ann     | Mary Ann University Hills Clinical Research, Irvine, TX                                                     |
| – 022 - Breving Joel T         | Behavioral Medical Research of Staten Island, Staten Island, NY                                             |
| – 023 - Omidvar Omid           | Collaborative Neuroscience Network, Garden Grove, CA                                                        |
| – 024 - Jones Beverly Nicholas | Clinical Trials of America Inc, Winston-Salem, NC                                                           |
| – 025 - Duboff Eugene          | Radiant Research, Denver, CO                                                                                |
| – 027 - Tuten Cindy            | Clinical Study Center of Asheville LLC, Asheville, NC                                                       |
| – 028 - Cohen Steven R.        | Suncoast Neuroscience Associates INC, St. Petersburg, FL                                                    |
| – 029 - McElveen William Alvin | Bradenton Research Center, Bradenton, FL                                                                    |
| – 032 - Randhawa Surinder K.   | Lynn Health Science Institute, Oklahoma City, OK                                                            |
| – 033 - Weiss Thomas R.        | Radiant Research, San Antonio San Antonio, TX                                                               |

*Effects of Souvenaid on plasma micronutrient levels and fatty acid profiles in mild and mild-to-moderate Alzheimer's disease*

- 034 - Chang Fen-Lei F. Fort Wayne Neurological Center, Fort Wayne, IN
- 035 - Jicha Gregory A. University of Kentucky Medical Center Sanders-Brown Center on Aging, Lexington, KY
- 036 - Rappaport Stephen A. Agewell, Indianapolis, IN
- 037 - Sadowsky Carl H. Premiere Research Institute, West Palm Beach, FL
- 038 - Mintzer Jacobo Medical University of South Carolina, N. Charleston, SC
- 039 - Kyle Michael L. Radiant Research Inc., Chicago, IL
- 040 - Bari Mohammed A. Synergy Clinical Research Center, National City, CA
- 041 - Goldstein Jerome San Francisco Clinical Research Center, San Francisco, CA
- 042 - Jariwala Arvind N. Wake Research Associates LLC, Raleigh, NC
- 043 - Sergi Paul A. Beacon Clinical Research LLC, Brockton, MA
- 044 - Lippa Carol F. Drexel University College of Medicine Department of Neurology, Philadelphia, PA
- 045 - Farmer Mildred V. Meridien Research, Brooksville, FL
- 046 - Lefebvre Gigi Claire Meridien Research, St. Petersburg, FL
- 047 - Cornacchione Mario Northeastern Pennsylvania Memory & Alzheimer's Center, Plains, PA
- 048 - Shepherd Timothy S Shepherd Healthcare, Lewisville, TX
- 049 - Bernstein, Allan L Radiant Research, Inc., Santa Rosa, CA
- 050 - Keating, Willem J North Georgia Premier Research, Dawsonville, Georgia
- 051 - Forchetti, Conceta NSI Research, Elk Grove Village, IL
- 052 - Gfeller, Eduard Florida Clinical Research Centers, Maitland, FL
- 053 - Hogancamp, Willem Innovative Clinical Concepts, Paducah, KY
- 056 - Downing, Michael FS Trials, Dallas, TX
- 057 - Naslund, Patricia K. Raleigh Neurology Associates, Raleigh, NC
